# Supplementary material for: The C-Terminal SynMuv/DdDUF926 Domain Regulates the Function of the N-Terminal Domain of DdNKAP
Source: PLoS One. 2016 Dec 20;11(12):e0168617. doi: 10.1371/journal.pone.0168617 (PMC5173251; doi:10.1371/journal.pone.0168617)
Supplement: S7 Table — Differentially regulated genes were identified using the DEseq package. GeneID is the dictyBase (http://dictybase.org/) gene identification number. (XLSX) [file pone.0168617.s010.xlsx]

## Sheet: Upregulated genes
Gene_ID	Gene Name	log2_fold_change	test_stat	p_value	q_value
DDB_G0269284	DDB_G0269284	7.61488	15.5246	5e-05	0.00156766
DDB_G0291740	DDB_G0291740	6.29485	5.36619	0.0001	0.00292514
DDB_G0294336	DDB_G0294336	6.21681	3.75564	0.0005	0.010954
DDB_G0288709	tgrM2	5.44482	6.18812	5e-05	0.00156766
DDB_G0269452	DDB_G0269452	5.01275	8.86042	5e-05	0.00156766
DDB_G0276587	hspG4	4.69197	6.83824	5e-05	0.00156766
DDB_G0279935	DDB_G0279935	4.57157	2.3801	5e-05	0.00156766
DDB_G0276875	hspG5	4.56217	7.2821	5e-05	0.00156766
DDB_G0276949	hspG6	4.42924	9.18627	5e-05	0.00156766
DDB_G0291738	rabG1	4.32721	7.57298	5e-05	0.00156766
DDB_G0275079	hspG1	4.23123	5.53831	5e-05	0.00156766
DDB_G0282061	DDB_G0282061	4.05239	2.97419	0.0002	0.005236
DDB_G0289919	ponJ	3.79102	3.11555	0.00115	0.0218167
DDB_G0274143	DDB_G0274143	3.75228	3.93234	5e-05	0.00156766
DDB_G0267868	DDB_G0267868	3.57016	4.35479	5e-05	0.00156766
DDB_G0276953	hspG9	3.56925	7.14411	5e-05	0.00156766
DDB_G0271218	DDB_G0271218	3.46229	3.68763	5e-05	0.00156766
DDB_G0277491	hspG12	3.34702	5.9222	5e-05	0.00156766
DDB_G0270924	DDB_G0270924	3.29384	2.10502	0.00165	0.0290889
DDB_G0277125	hspG11	3.29361	5.8987	5e-05	0.00156766
DDB_G0288591	DDB_G0288591	3.22108	6.65556	5e-05	0.00156766
DDB_G0276951	hspG7	3.21447	6.76234	5e-05	0.00156766
DDB_G0290465	DDB_G0290465	3.18836	6.78001	5e-05	0.00156766
DDB_G0276003	hspG2	3.16537	6.24965	5e-05	0.00156766
DDB_G0277119	hspG8	3.08141	6.24365	5e-05	0.00156766
DDB_G0291314	DDB_G0291314	3.05928	4.39637	0.00165	0.0290889
DDB_G0290969	DDB_G0290969	2.98531	3.31159	0.00015	0.00413368
DDB_G0275599	DDB_G0275599	2.96428	3.27396	0.00025	0.00638537
DDB_G0287695	DDB_G0287695	2.89553	5.40677	5e-05	0.00156766
DDB_G0291568	dnaja1	2.88269	5.99261	5e-05	0.00156766
DDB_G0280141	DDB_G0280141	2.86791	5.99684	5e-05	0.00156766
DDB_G0278079	exdl2A	2.79034	5.9938	5e-05	0.00156766
DDB_G0276597	DDB_G0276597	2.78866	3.12386	0.00015	0.00413368
DDB_G0287787	DDB_G0287787	2.78504	1.69455	0.00205	0.0345138
DDB_G0281607	DDB_G0281607	2.73255	2.70042	0.00155	0.027699
DDB_G0279483	pldB	2.71983	2.83714	0.0004	0.00920615
DDB_G0279275	DDB_G0279275	2.68839	3.4426	5e-05	0.00156766
DDB_G0282517	DDB_G0282517	2.65633	3.04336	0.0001	0.00292514
DDB_G0285003	aifC	2.63999	5.75506	5e-05	0.00156766
DDB_G0275133	DDB_G0275133	2.63369	5.03101	5e-05	0.00156766
DDB_G0288865	DDB_G0288865	2.62376	3.99642	5e-05	0.00156766
DDB_G0292462	DDB_G0292462	2.59812	2.38007	0.00285	0.0446117
DDB_G0274705	DDB_G0274705	2.59575	3.8307	5e-05	0.00156766
DDB_G0282577	DDB_G0282577	2.58979	3.45297	5e-05	0.00156766
DDB_G0270606	DDB_G0270606	2.58499	3.50194	5e-05	0.00156766
DDB_G0293674	DDB_G0293674	2.5724	6.3745	5e-05	0.00156766
DDB_G0268660	DDB_G0268660	2.56654	3.24628	5e-05	0.00156766
DDB_G0279211	DDB_G0279211	2.56265	6.71601	5e-05	0.00156766
DDB_G0279799	cprB	2.55427	5.63645	5e-05	0.00156766
DDB_G0276607	hspG3	2.54852	4.21489	5e-05	0.00156766
DDB_G0272466	DDB_G0272466	2.51903	4.87449	5e-05	0.00156766
DDB_G0278371	spc1	2.50418	2.67556	0.00045	0.0102
DDB_G0276271	DDB_G0276271	2.49389	4.80327	5e-05	0.00156766
DDB_G0284429	DDB_G0284429	2.49315	3.83899	5e-05	0.00156766
DDB_G0272386	DDB_G0272386	2.47042	3.86952	5e-05	0.00156766
DDB_G0271134	celA	2.41661	5.00892	5e-05	0.00156766
DDB_G0270124	rasX	2.41115	3.43918	5e-05	0.00156766
DDB_G0280051	DDB_G0280051	2.37521	5.4507	5e-05	0.00156766
DDB_G0294589	DDB_G0294589	2.36656	4.88075	5e-05	0.00156766
DDB_G0271852	rtaA	2.36207	2.73002	5e-05	0.00156766
DDB_G0275163	DDB_G0275163	2.36163	3.5172	5e-05	0.00156766
DDB_G0279369	DDB_G0279369	2.35363	5.14015	5e-05	0.00156766
DDB_G0291790	DDB_G0291790	2.33133	3.2169	5e-05	0.00156766
DDB_G0267792	DDB_G0267792	2.31995	2.90327	0.00015	0.00413368
DDB_G0295811	DDB_G0295811	2.31285	2.22829	5e-05	0.00156766
DDB_G0279065	DDB_G0279065	2.30736	2.30484	0.00145	0.0263161
DDB_G0271152	DDB_G0271152	2.25896	2.27248	0.00175	0.0305433
DDB_G0291676	DDB_G0291676	2.23883	3.58749	5e-05	0.00156766
DDB_G0269736	DDB_G0269736	2.23268	1.63065	0.0011	0.021214
DDB_G0285917	DDB_G0285917	2.22637	2.68223	0.0001	0.00292514
DDB_G0293662	DDB_G0293662	2.21707	2.84547	5e-05	0.00156766
DDB_G0276429	DDB_G0276429	2.20908	2.28494	0.00105	0.0204
DDB_G0284763	DDB_G0284763	2.20747	3.00508	5e-05	0.00156766
DDB_G0281105	DDB_G0281105	2.1994	2.00566	0.0032	0.0485658
DDB_G0284277	DDB_G0284277	2.19635	3.26953	5e-05	0.00156766
DDB_G0285983	DDB_G0285983	2.17838	2.52339	0.00035	0.00829231
DDB_G0291253	dia2	2.17424	3.8118	5e-05	0.00156766
DDB_G0285127	DDB_G0285127	2.1389	2.41246	0.00105	0.0204
DDB_G0274701	DDB_G0274701	2.13276	2.97139	0.0001	0.00292514
DDB_G0274369	DDB_G0274369	2.09554	2.32772	0.00145	0.0263161
DDB_G0276817	DDB_G0276817	2.09152	3.50626	5e-05	0.00156766
DDB_G0275023	DDB_G0275023	2.08412	3.25203	5e-05	0.00156766
DDB_G0270540	DDB_G0270540	2.06892	2.64234	0.0002	0.005236
DDB_G0275341	DDB_G0275341	2.0129	2.1712	0.00145	0.0263161
DDB_G0276407	DDB_G0276407	2.00837	2.12129	0.0016	0.0284952
DDB_G0305372	DDB_G0305372	1.98865	2.06786	0.0006	0.0127707
DDB_G0281635	DDB_G0281635	1.98799	2.11532	0.0024	0.0389656
DDB_G0268494	DDB_G0268494	1.98733	2.21991	0.00075	0.0154
DDB_G0289483	ctxI	1.987	4.63664	0.0005	0.00345
DDB_G0290133	DDB_G0290133	1.97998	4.8319	5e-05	0.00156766
DDB_G0280335	DDB_G0280335	1.96527	3.24746	5e-05	0.00156766
DDB_G0280819	aoxA	1.96446	4.52071	5e-05	0.00156766
DDB_G0268026	DDB_G0268026	1.93691	4.56766	5e-05	0.00156766
DDB_G0279637	DDB_G0279637	1.93681	3.75502	5e-05	0.00156766
DDB_G0268148	DDB_G0268148	1.92912	3.70875	5e-05	0.00156766
DDB_G0280461	DDB_G0280461	1.90469	2.31305	0.00105	0.0204
DDB_G0292808	cspB	1.8988	3.58645	5e-05	0.00156766
DDB_G0289047	DDB_G0289047	1.89528	4.97792	5e-05	0.00156766
DDB_G0291480	DDB_G0291480	1.88133	2.67131	5e-05	0.00156766
DDB_G0276907	DDB_G0276907	1.87692	2.72465	5e-05	0.00156766
DDB_G0279969	DDB_G0279969	1.87619	4.32717	5e-05	0.00156766
DDB_G0281087	gtaV	1.85157	2.07572	0.00255	0.0410194
DDB_G0287101	noxB	1.83229	2.16859	0.00145	0.0263161
DDB_G0280069	DDB_G0280069	1.82691	4.41281	5e-05	0.00156766
DDB_G0270276	DDB_G0270276	1.81877	3.46677	5e-05	0.00156766
DDB_G0280445	DDB_G0280445	1.81678	4.68495	5e-05	0.00156766
DDB_G0278655	DDB_G0278655	1.80022	2.34909	0.0003	0.00734019
DDB_G0289039	DDB_G0289039	1.79384	2.45644	0.00015	0.00413368
DDB_G0269628	DDB_G0269628	1.783	3.64148	5e-05	0.00156766
DDB_G0293102	DDB_G0293102	1.76257	3.56094	5e-05	0.00156766
DDB_G0285899	DDB_G0285899	1.75807	2.2234	0.0013	0.0243535
DDB_G0285615	iliA	1.74571	3.79119	5e-05	0.00156766
DDB_G0270000	DDB_G0270000	1.7456	2.0047	0.00215	0.0357378
DDB_G0270330	DDB_G0270330	1.72965	2.93215	5e-05	0.00156766
DDB_G0293048	DDB_G0293048	1.72926	2.48274	0.0001	0.00292514
DDB_G0275683	DDB_G0275683	1.7224	2.98006	5e-05	0.00156766
DDB_G0276899	DDB_G0276899	1.71858	4.44241	5e-05	0.00156766
DDB_G0286383	DDB_G0286383	1.71516	2.76396	5e-05	0.00156766
DDB_G0270328	DDB_G0270328	1.71268	2.86711	5e-05	0.00156766
DDB_G0278743	DDB_G0278743	1.70959	3.68071	5e-05	0.00156766
DDB_G0287225	DDB_G0287225	1.70216	3.5442	5e-05	0.00156766
DDB_G0275173	hbx2	1.69586	2.11836	0.0012	0.0226014
DDB_G0282715	DDB_G0282715	1.68925	3.21071	5e-05	0.00156766
DDB_G0282643	DDB_G0282643	1.68013	2.48159	0.0002	0.005236
DDB_G0276531	DDB_G0276531	1.67831	4.18409	5e-05	0.00156766
DDB_G0278635	DDB_G0278635	1.66808	3.59505	5e-05	0.00156766
DDB_G0279955	DDB_G0279955	1.66567	3.24181	5e-05	0.00156766
DDB_G0281853	iliL	1.65285	3.14347	5e-05	0.00156766
DDB_G0272865	DDB_G0272865	1.65037	3.24714	5e-05	0.00156766
DDB_G0272783	rliA	1.64602	2.90611	5e-05	0.00156766
DDB_G0276709	DDB_G0276709	1.64559	2.47277	5e-05	0.00156766
DDB_G0288851	DDB_G0288851	1.64008	2.72344	5e-05	0.00156766
DDB_G0291281	DDB_G0291281	1.63784	3.71035	5e-05	0.00156766
DDB_G0270750	DDB_G0270750	1.63609	2.96154	5e-05	0.00156766
DDB_G0284777	DDB_G0284777	1.63506	3.00786	5e-05	0.00156766
DDB_G0274115	abcG12	1.63451	4.20355	5e-05	0.00156766
DDB_G0274259	DDB_G0274259	1.63252	4.138	5e-05	0.00156766
DDB_G0283727	DDB_G0283727	1.63175	3.81767	5e-05	0.00156766
DDB_G0277129	DDB_G0277129	1.62791	2.08732	0.00135	0.0249333
DDB_G0277369	DDB_G0277369	1.62599	2.17143	0.00025	0.00638537
DDB_G0278679	cyp513F1	1.62142	4.28539	5e-05	0.00156766
DDB_G0270644	DDB_G0270644	1.61525	2.99741	5e-05	0.00156766
DDB_G0285289	DDB_G0285289	1.61402	2.26771	0.0004	0.00920615
DDB_G0269206	abcG21	1.60318	3.28818	5e-05	0.00156766
DDB_G0268076	DDB_G0268076	1.59862	2.5952	5e-05	0.00156766
DDB_G0284279	DDB_G0284279	1.59362	2.64518	5e-05	0.00156766
DDB_G0271050	magA	1.58791	4.05009	5e-05	0.00156766
DDB_G0284643	DDB_G0284643	1.5866	4.14684	5e-05	0.00156766
DDB_G0276947	trap1	1.58115	4.17838	5e-05	0.00156766
DDB_G0276291	DDB_G0276291	1.57997	2.81208	0.0006	0.0127707
DDB_G0282475	gxcF	1.57581	3.30258	5e-05	0.00156766
DDB_G0289795	DDB_G0289795	1.57575	1.99764	0.0027	0.0426462
DDB_G0274495	DDB_G0274495	1.5731	3.488	5e-05	0.00156766
DDB_G0292738	DDB_G0292738	1.57052	3.39176	5e-05	0.00156766
DDB_G0275519	DDB_G0275519	1.5651	3.97279	5e-05	0.00156766
DDB_G0278817	DDB_G0278817	1.56362	2.09529	0.001	0.0196473
DDB_G0279681	DDB_G0279681	1.5628	2.24763	0.00015	0.00413368
DDB_G0274223	DDB_G0274223	1.56067	3.91633	5e-05	0.00156766
DDB_G0276215	DDB_G0276215	1.55821	2.72252	5e-05	0.00156766
DDB_G0277103	DDB_G0277103	1.54081	2.68671	5e-05	0.00156766
DDB_G0268948	DDB_G0268948	1.5365	3.20844	5e-05	0.00156766
DDB_G0288921	hspI	1.53481	2.22245	0.0008	0.0161418
DDB_G0269358	DDB_G0269358	1.53202	2.67633	0.0002	0.005236
DDB_G0277333	DDB_G0277333	1.53156	3.48517	5e-05	0.00156766
DDB_G0286041	iliJ	1.53056	2.90782	5e-05	0.00156766
DDB_G0276841	DDB_G0276841	1.52961	3.83156	5e-05	0.00156766
DDB_G0289211	DDB_G0289211	1.52922	3.33794	5e-05	0.00156766
DDB_G0277599	DDB_G0277599	1.52315	2.32625	0.00055	0.0119
DDB_G0286701	DDB_G0286701	1.5194	3.23229	5e-05	0.00156766
DDB_G0279871	DDB_G0279871	1.51848	3.02656	5e-05	0.00156766
DDB_G0280211	DDB_G0280211	1.51134	3.72355	5e-05	0.00156766
DDB_G0284687	DDB_G0284687	1.50836	2.45234	0.00015	0.00413368
DDB_G0288635	DDB_G0288635	1.49709	3.63297	5e-05	0.00156766
DDB_G0283453	dgcA	1.49652	2.68674	0.00015	0.00413368
DDB_G0287583	gerC	1.4939	2.78844	5e-05	0.00156766
DDB_G0270126	rasY	1.49055	1.98019	0.00165	0.0290889
DDB_G0271068	iliC	1.4878	3.20661	5e-05	0.00156766
DDB_G0269592	DDB_G0269592	1.47305	3.26538	5e-05	0.00156766
DDB_G0288715	gadB	1.47179	3.46445	5e-05	0.00156766
DDB_G0289411	DDB_G0289411	1.46782	2.4345	0.0001	0.00292514
DDB_G0291075	warA	1.4629	2.99683	5e-05	0.00156766
DDB_G0293836	DDB_G0293836	1.46271	3.37954	5e-05	0.00156766
DDB_G0293276	DDB_G0293276	1.4609	2.78724	5e-05	0.00156766
DDB_G0268122	DDB_G0268122	1.45705	2.66237	5e-05	0.00156766
DDB_G0277667	DDB_G0277667	1.45487	2.94549	5e-05	0.00156766
DDB_G0280919	DDB_G0280919	1.45449	2.15397	0.00065	0.0136958
DDB_G0281379	DDB_G0281379	1.4543	1.90436	0.00145	0.0263161
DDB_G0286227	DDB_G0286227	1.44806	2.04451	0.0008	0.0161418
DDB_G0282817	patB	1.44418	3.36403	5e-05	0.00156766
DDB_G0270132	DDB_G0270132	1.4395	2.03678	0.001	0.0196473
DDB_G0283655	DDB_G0283655	1.42452	2.65075	0.0001	0.00292514
DDB_G0292714	DDB_G0292714	1.42155	3.01275	5e-05	0.00156766
DDB_G0279041	DDB_G0279041	1.41956	2.20033	0.0005	0.010954
DDB_G0268878	DDB_G0268878	1.41901	2.88518	5e-05	0.00156766
DDB_G0293392	DDB_G0293392	1.41449	2.66706	0.0001	0.00292514
DDB_G0268444	DDB_G0268444	1.41298	1.95373	0.00135	0.0249333
DDB_G0271294	DDB_G0271294	1.40876	2.3187	0.0004	0.00920615
DDB_G0289537	DDB_G0289537	1.40806	2.59608	5e-05	0.00156766
DDB_G0285499	DDB_G0285499	1.40146	1.98754	0.0022	0.0362809
DDB_G0284867	abc	1.39969	3.65002	5e-05	0.00156766
DDB_G0293372	ttc27	1.39636	3.65196	5e-05	0.00156766
DDB_G0285065	DDB_G0285065	1.39055	2.79553	5e-05	0.00156766
DDB_G0290659	sdrA	1.38339	3.52396	5e-05	0.00156766
DDB_G0289473	DDB_G0289473	1.37843	3.29558	5e-05	0.00156766
DDB_G0267930	DDB_G0267930	1.37668	2.73204	5e-05	0.00156766
DDB_G0287585	DDB_G0287585	1.36771	1.91878	0.0007	0.01123
DDB_G0268536	DDB_G0268536	1.35721	2.84256	5e-05	0.00156766
DDB_G0284613	D7	1.35684	2.7332	5e-05	0.00156766
DDB_G0269212	abcG11	1.35662	3.41961	5e-05	0.00156766
DDB_G0286843	gtaQ	1.35502	3.37434	5e-05	0.00156766
DDB_G0275013	omt4	1.35206	2.26899	0.0004	0.00920615
DDB_G0281551	guaA	1.35137	3.38441	5e-05	0.00156766
DDB_G0288201	DDB_G0288201	1.3497	2.95841	5e-05	0.00156766
DDB_G0277141	cotC	1.34469	2.0601	0.0006	0.0127707
DDB_G0270366	DDB_G0270366	1.34286	3.26366	5e-05	0.00156766
DDB_G0285397	DDB_G0285397	1.33881	2.35303	0.0003	0.00734019
DDB_G0271878	DDB_G0271878	1.33496	2.43989	5e-05	0.00156766
DDB_G0280369	DDB_G0280369	1.33248	3.10437	5e-05	0.00156766
DDB_G0275689	abcG2	1.33187	3.4395	5e-05	0.00156766
DDB_G0284535	cyp508A4	1.33025	2.88289	5e-05	0.00156766
DDB_G0292764	DDB_G0292764	1.32939	2.7967	5e-05	0.00156766
DDB_G0290053	tmem170	1.32834	1.9495	0.00185	0.0316556
DDB_G0291049	ost2	1.32502	2.15007	0.00035	0.00829231
DDB_G0281653	DDB_G0281653	1.32279	3.04248	5e-05	0.00156766
DDB_G0282197	DDB_G0282197	1.32241	2.53681	5e-05	0.00156766
DDB_G0270088	DDB_G0270088	1.31894	2.9751	5e-05	0.00156766
DDB_G0268566	DDB_G0268566	1.31332	1.92453	0.00215	0.0357378
DDB_G0291694	DDB_G0291694	1.30705	2.83085	5e-05	0.00156766
DDB_G0286911	DDB_G0286911	1.29545	2.27361	0.0003	0.00734019
DDB_G0271270	DDB_G0271270	1.29356	2.3674	5e-05	0.00156766
DDB_G0276681	DDB_G0276681	1.29044	3.36976	5e-05	0.00156766
DDB_G0268386	DDB_G0268386	1.28814	3.00809	5e-05	0.00156766
DDB_G0288187	ddi1	1.28737	3.23756	5e-05	0.00156766
DDB_G0269254	sigJ	1.28402	3.00957	5e-05	0.00156766
DDB_G0285637	glb2	1.28381	2.09516	0.0006	0.0127707
DDB_G0290071	sigG	1.27781	2.59127	5e-05	0.00156766
DDB_G0288639	DDB_G0288639	1.27276	3.38729	5e-05	0.00156766
DDB_G0287357	tpp1D	1.27095	1.86131	0.00305	0.0468323
DDB_G0278891	DDB_G0278891	1.27028	2.46002	0.0002	0.005236
DDB_G0276761	cotB	1.26924	1.91213	0.0016	0.0284952
DDB_G0276769	DDB_G0276769	1.26913	3.26993	5e-05	0.00156766
DDB_G0285149	DDB_G0285149	1.26867	2.06988	5e-05	0.00156766
DDB_G0270308	DDB_G0270308	1.26766	2.20683	0.0003	0.00734019
DDB_G0280315	DDB_G0280315	1.25697	3.18453	5e-05	0.00156766
DDB_G0293222	DDB_G0293222	1.25508	2.36626	0.0005	0.010954
DDB_G0275557	DDB_G0275557	1.24906	2.35503	0.0003	0.00734019
DDB_G0279093	DDB_G0279093	1.24821	2.82391	5e-05	0.00156766
DDB_G0276941	cotA	1.24538	2.09838	0.0004	0.00920615
DDB_G0267456	cbp2	1.24446	2.86098	5e-05	0.00156766
DDB_G0283281	DDB_G0283281	1.24085	1.9996	0.00135	0.0249333
DDB_G0277379	pspD	1.23916	1.86952	0.00135	0.0249333
DDB_G0269398	DDB_G0269398	1.23897	2.264	0.0003	0.00734019
DDB_G0278749	DDB_G0278749	1.23514	2.84399	5e-05	0.00156766
DDB_G0287671	DDB_G0287671	1.23169	2.75788	5e-05	0.00156766
DDB_G0289921	DDB_G0289921	1.22808	3.04191	5e-05	0.00156766
DDB_G0285923	DDB_G0285923	1.2276	2.48465	5e-05	0.00156766
DDB_G0293122	DDB_G0293122	1.22664	2.95697	5e-05	0.00156766
DDB_G0287659	nagD	1.22624	2.24567	0.0003	0.00734019
DDB_G0272514	DDB_G0272514	1.22369	2.26131	0.0003	0.00734019
DDB_G0293584	sqle	1.22302	2.55574	5e-05	0.00156766
DDB_G0291123	glpD	1.22277	1.87804	0.00185	0.0316556
DDB_G0268344	DDB_G0268344	1.21978	2.36595	0.00015	0.00413368
DDB_G0291562	osbL	1.21827	2.61267	5e-05	0.00156766
DDB_G0290431	DDB_G0290431	1.21516	2.83079	5e-05	0.00156766
DDB_G0270368	DDB_G0270368	1.2101	2.9836	5e-05	0.00156766
DDB_G0276679	DDB_G0276679	1.20876	2.48444	5e-05	0.00156766
DDB_G0268154	DDB_G0268154	1.20452	2.76596	5e-05	0.00156766
DDB_G0277999	DDB_G0277999	1.20424	1.97974	0.00075	0.0154
DDB_G0270006	jcdI	1.19902	3.10269	5e-05	0.00156766
DDB_G0284579	DDB_G0284579	1.19875	3.15909	5e-05	0.00156766
DDB_G0277253	mscS	1.1934	2.74305	5e-05	0.00156766
DDB_G0347907	DDB_G0347907	1.19291	1.75295	0.00305	0.0468323
DDB_G0287563	mut	1.18839	1.79904	0.00255	0.0410194
DDB_G0267400	hspD	1.1846	2.42473	0.00015	0.00413368
DDB_G0270766	DDB_G0270766	1.18306	3.08259	5e-05	0.00156766
DDB_G0276375	DDB_G0276375	1.18102	2.19912	0.0007	0.0145734
DDB_G0276551	DDB_G0276551	1.1734	2.24235	0.00015	0.00413368
DDB_G0269738	desA	1.17067	2.92529	5e-05	0.00156766
DDB_G0276661	DDB_G0276661	1.16578	3.05269	5e-05	0.00156766
DDB_G0278317	mybF	1.16099	1.89871	0.00165	0.0290889
DDB_G0295807	DDB_G0295807	1.15487	2.91414	5e-05	0.00156766
DDB_G0279433	metap1	1.15244	2.20215	0.0001	0.00292514
DDB_G0292574	DDB_G0292574	1.15236	2.06328	0.0006	0.0127707
DDB_G0279743	DDB_G0279743	1.13703	2.70947	5e-05	0.00156766
DDB_G0268216	fncD2	1.13474	2.73849	5e-05	0.00156766
DDB_G0274231	DDB_G0274231	1.13304	2.30755	0.0002	0.005236
DDB_G0278789	DDB_G0278789	1.13293	3.01974	5e-05	0.00156766
DDB_G0278255	DDB_G0278255	1.13026	2.97724	5e-05	0.00156766
DDB_G0289521	srsA	1.12896	2.18472	0.0007	0.0145734
DDB_G0279105	DDB_G0279105	1.12523	2.69011	5e-05	0.00156766
DDB_G0273017	DDB_G0273017	1.1224	2.67475	5e-05	0.00156766
DDB_G0268070	DDB_G0268070	1.11868	2.37394	5e-05	0.00156766
DDB_G0289037	ufc1	1.11381	2.17209	0.002	0.03389
DDB_G0277203	DDB_G0277203	1.11225	2.9899	5e-05	0.00156766
DDB_G0292458	DDB_G0292458	1.1075	2.67774	5e-05	0.00156766
DDB_G0271628	dlpC	1.10745	1.96647	0.0002	0.005236
DDB_G0279873	DDB_G0279873	1.10397	1.77875	0.00185	0.0316556
DDB_G0288707	DDB_G0288707	1.10303	2.79978	5e-05	0.00156766
DDB_G0277145	pkaD	1.09986	1.83491	0.0014	0.0256757
DDB_G0271980	rabR	1.09931	1.96344	0.0027	0.0426462
DDB_G0290957	cprA	1.0956	2.77404	5e-05	0.00156766
DDB_G0288381	DDB_G0288381	1.09512	2.5121	5e-05	0.00156766
DDB_G0292404	sti1	1.09062	2.74484	5e-05	0.00156766
DDB_G0274447	psmG2	1.09034	2.15242	0.00035	0.00829231
DDB_G0282701	DDB_G0282701	1.08963	2.23576	0.00015	0.00413368
DDB_G0271692	comC	1.08596	2.07278	0.00075	0.0154
DDB_G0286221	pigC	1.08386	1.82748	0.0021	0.0351297
DDB_G0270310	DDB_G0270310	1.0777	2.39826	5e-05	0.00156766
DDB_G0283925	DDB_G0283925	1.07498	2.55366	5e-05	0.00156766
DDB_G0280429	DDB_G0280429	1.07242	1.95246	0.0014	0.0256757
DDB_G0292378	fhbA	1.06503	1.9722	0.0005	0.010954
DDB_G0278571	DDB_G0278571	1.06478	1.86512	0.00265	0.0421745
DDB_G0279571	DDB_G0279571	1.06455	2.19856	0.00025	0.00638537
DDB_G0292538	gtpbp1	1.06339	2.64169	5e-05	0.00156766
DDB_G0289693	DDB_G0289693	1.06303	2.19833	0.00015	0.00413368
DDB_G0291025	DDB_G0291025	1.06258	1.76869	0.00325	0.0491111
DDB_G0269802	DDB_G0269802	1.0587	1.9836	0.0008	0.0161418
DDB_G0290725	lyrm4	1.05593	1.97831	0.0014	0.0256757
DDB_G0288891	hemH	1.05496	2.74403	5e-05	0.00156766
DDB_G0281507	colC	1.05324	1.94057	0.0017	0.02992
DDB_G0287657	tpsA	1.04975	2.70975	5e-05	0.00156766
DDB_G0270946	DDB_G0270946	1.04707	2.5656	5e-05	0.00156766
DDB_G0284547	DDB_G0284547	1.04153	2.37582	5e-05	0.00156766
DDB_G0287515	tat	1.03771	2.17188	0.0003	0.00734019
DDB_G0269112	celB	1.0357	2.52554	5e-05	0.00156766
DDB_G0280317	gsta3	1.0337	2.70975	5e-05	0.00156766
DDB_G0293738	cyp521A1	1.03192	1.85878	0.00155	0.027699
DDB_G0284357	dduE	1.02995	2.66917	5e-05	0.00156766
DDB_G0267574	DDB_G0267574	1.02514	2.33184	0.0001	0.00292514
DDB_G0276789	DDB_G0276789	1.02511	1.96419	0.00115	0.0218167
DDB_G0291922	taz	1.02192	2.00479	0.00055	0.0119
DDB_G0272827	cbpI	1.01781	1.74518	0.0033	0.0496517
DDB_G0269342	DDB_G0269342	1.01747	2.0604	0.00055	0.0119
DDB_G0289311	DDB_G0289311	1.00961	2.32693	5e-05	0.00156766
DDB_G0279707	iliP	1.00908	2.64126	5e-05	0.00156766
DDB_G0274489	DDB_G0274489	1.00667	1.92012	0.0015	0.0270361
DDB_G0284881	DDB_G0284881	1.00065	2.38281	0.0001	0.00292514
DDB_G0281049	DDB_G0281049	0.998888	1.88546	0.00045	0.0102
DDB_G0278503	DDB_G0278503	0.998771	2.15719	0.00035	0.00829231
DDB_G0280763	hemA	0.995269	2.25562	0.00025	0.00638537
DDB_G0267784	DDB_G0267784	0.993916	1.82391	0.0023	0.0376338
DDB_G0272839	DDB_G0272839	0.993128	1.83964	0.00115	0.0218167
DDB_G0283701	guaB	0.988854	2.04307	0.0003	0.00734019
DDB_G0284401	DDB_G0284401	0.982735	2.07272	0.00035	0.00829231
DDB_G0290849	zmpste24	0.982409	1.94229	0.00105	0.0204
DDB_G0283159	DDB_G0283159	0.982239	2.49337	5e-05	0.00156766
DDB_G0281549	coxA	0.976428	2.49657	5e-05	0.00156766
DDB_G0282923	rdeA	0.974483	2.09358	0.00025	0.00638537
DDB_G0270098	sqstm1	0.966418	2.39961	5e-05	0.00156766
DDB_G0280137	DDB_G0280137	0.96507	1.85187	0.00215	0.0357378
DDB_G0270058	DDB_G0270058	0.964221	2.10081	0.0004	0.00920615
DDB_G0288529	DDB_G0288529	0.963331	2.37019	5e-05	0.00156766
DDB_G0269232	DDB_G0269232	0.961919	1.8237	0.00275	0.0432402
DDB_G0286259	DDB_G0286259	0.960198	2.00435	0.00065	0.0136958
DDB_G0280219	vps55	0.956945	2.12313	0.00045	0.0102
DDB_G0293364	sigB	0.955838	1.99003	0.0008	0.0161418
DDB_G0279933	DDB_G0279933	0.955459	2.15813	0.0003	0.00734019
DDB_G0271678	pckA	0.949917	2.45215	5e-05	0.00156766
DDB_G0280897	pgmB	0.948561	2.383	0.00015	0.00413368
DDB_G0287201	DDB_G0287201	0.946423	2.49559	5e-05	0.00156766
DDB_G0267814	DDB_G0267814	0.94633	2.05683	0.0004	0.00920615
DDB_G0295779	DDB_G0295779	0.940912	2.4839	5e-05	0.00156766
DDB_G0275671	DDB_G0275671	0.932944	2.25558	0.00015	0.00413368
DDB_G0286907	ubqD	0.928833	2.23239	0.0001	0.00292514
DDB_G0279921	gp130	0.927552	1.77949	0.00125	0.0235009
DDB_G0283813	hmgL	0.92442	2.35975	0.0001	0.00292514
DDB_G0269458	ubqJ	0.924344	2.25933	0.0001	0.00292514
DDB_G0279825	DDB_G0279825	0.920762	1.79915	0.00175	0.0305433
DDB_G0285025	alrE	0.918353	2.40397	5e-05	0.00156766
DDB_G0284975	tpsB	0.917834	2.09568	0.0004	0.00920615
DDB_G0268090	DDB_G0268090	0.914827	2.35919	5e-05	0.00156766
DDB_G0292250	sqrdl	0.914508	1.98727	0.0008	0.0161418
DDB_G0274661	DDB_G0274661	0.912322	2.29493	5e-05	0.00156766
DDB_G0275161	DDB_G0275161	0.911563	2.03679	0.0005	0.010954
DDB_G0284041	rcdII	0.909234	2.20677	0.00015	0.00413368
DDB_G0272756	csbC	0.899429	2.2201	0.00025	0.00638537
DDB_G0287513	jcdG	0.899092	2.3181	5e-05	0.00156766
DDB_G0270362	zfand	0.898775	2.09855	0.0002	0.005236
DDB_G0288655	ugt52	0.897717	2.24385	5e-05	0.00156766
DDB_G0268886	vps13E	0.888515	2.06496	0.00035	0.00829231
DDB_G0275813	DDB_G0275813	0.886228	1.94337	0.00075	0.0154
DDB_G0287685	cinC	0.885801	2.15352	0.0003	0.00734019
DDB_G0276331	pyr4	0.885404	2.33197	5e-05	0.00156766
DDB_G0278401	cprH	0.883529	2.10126	0.0004	0.00920615
DDB_G0272396	DDB_G0272396	0.879505	1.87026	0.00175	0.0305433
DDB_G0269594	DDB_G0269594	0.875652	2.27655	5e-05	0.00156766
DDB_G0287717	iliD	0.874744	2.20665	5e-05	0.00156766
DDB_G0288145	purL	0.872868	2.16456	0.0002	0.005236
DDB_G0288011	DDB_G0288011	0.859842	2.19219	0.0001	0.00292514
DDB_G0279721	ubqH	0.8592	1.9351	0.0005	0.010954
DDB_G0288501	ddx42	0.853397	1.91879	0.00065	0.0136958
DDB_G0277653	DDB_G0277653	0.850946	2.14198	0.0002	0.005236
DDB_G0283121	DDB_G0283121	0.849015	2.07475	0.0002	0.005236
DDB_G0280853	gtaU	0.847051	2.19316	0.0001	0.00292514
DDB_G0274943	ranB	0.844743	2.07065	0.00035	0.00829231
DDB_G0268854	gnt4	0.843584	1.77816	0.00245	0.0397158
DDB_G0276881	DDB_G0276881	0.842774	2.14705	0.00035	0.00829231
DDB_G0269226	cas1	0.838247	2.09816	0.0006	0.0127707
DDB_G0271936	DDB_G0271936	0.837993	1.96667	0.001	0.0196473
DDB_G0275523	DDB_G0275523	0.835805	1.81331	0.00185	0.0316556
DDB_G0280533	lmcB	0.833354	1.94031	0.00115	0.0218167
DDB_G0279429	DDB_G0279429	0.829074	2.15437	0.0001	0.00292514
DDB_G0279951	DDB_G0279951	0.828315	1.82393	0.00105	0.0204
DDB_G0289205	DDB_G0289205	0.825923	1.78492	0.00255	0.0410194
DDB_G0293762	DDB_G0293762	0.825061	1.84452	0.00205	0.0345138
DDB_G0278739	I6KA	0.824865	1.96721	0.0005	0.010954
DDB_G0285419	cryS	0.823419	2.08805	0.00015	0.00413368
DDB_G0270096	DDB_G0270096	0.822875	2.14715	0.0002	0.005236
DDB_G0286363	DDB_G0286363	0.822538	1.83061	0.0015	0.0270361
DDB_G0269712	ahsa	0.821882	2.03211	0.0008	0.0161418
DDB_G0269582	DDB_G0269582	0.82109	1.70886	0.0029	0.0451917
DDB_G0276335	pyr1-3	0.814924	1.87368	0.00155	0.027699
DDB_G0272951	DDB_G0272951	0.811206	2.06385	0.00035	0.00829231
DDB_G0272767	DDB_G0272767	0.808741	2.08954	0.0002	0.005236
DDB_G0276445	DDB_G0276445	0.808064	1.89624	0.00115	0.0218167
DDB_G0278781	pah	0.801746	2.10981	5e-05	0.00156766
DDB_G0290187	hspH	0.801647	1.94028	0.00085	0.0170195
DDB_G0293388	DDB_G0293388	0.800744	2.12979	0.0001	0.00292514
DDB_G0277725	thfA	0.799765	2.13407	0.0002	0.005236
DDB_G0278575	DDB_G0278575	0.796443	1.8075	0.0012	0.0226014
DDB_G0292362	DDB_G0292362	0.796092	2.0107	0.0006	0.0127707
DDB_G0282113	DDB_G0282113	0.791035	1.80467	0.00165	0.0290889
DDB_G0276073	recA	0.79059	2.06383	0.00045	0.0102
DDB_G0279611	DDB_G0279611	0.789374	2.05424	0.00045	0.0102
DDB_G0285351	DDB_G0285351	0.788635	2.06622	0.0005	0.010954
DDB_G0269292	sugt1	0.78487	2.01858	0.0005	0.010954
DDB_G0292632	folC	0.782818	1.94087	0.00065	0.0136958
DDB_G0288849	DDB_G0288849	0.781853	1.87999	0.00115	0.0218167
DDB_G0290343	sodE	0.779274	1.8855	0.00085	0.0170195
DDB_G0283763	grpE	0.779257	1.97395	0.00095	0.0188417
DDB_G0285011	DDB_G0285011	0.779023	2.07401	0.00065	0.0136958
DDB_G0291928	ubqI	0.767933	1.74453	0.0028	0.0439604
DDB_G0285193	hprT	0.767182	2.05351	0.00045	0.0102
DDB_G0270112	DDB_G0270112	0.764778	1.91041	0.0007	0.0145734
DDB_G0282287	DDB_G0282287	0.761389	1.89645	0.0008	0.0161418
DDB_G0276273	H2Bv2	0.761265	1.95003	0.001	0.0196473
DDB_G0267414	repD	0.76019	1.88089	0.0009	0.017952
DDB_G0287229	chdh	0.757703	1.67937	0.0031	0.0474608
DDB_G0274879	DDB_G0274879	0.757012	1.76438	0.0031	0.0474608
DDB_G0293298	mhsp70	0.756752	1.79258	0.0026	0.0416318
DDB_G0270778	DDB_G0270778	0.752282	1.62239	0.0022	0.0362809
DDB_G0283877	dus2l	0.745059	1.80108	0.0018	0.0312597
DDB_G0287617	DDB_G0287617	0.743101	1.76419	0.00235	0.0382725
DDB_G0271016	DDB_G0271016	0.742643	1.9863	0.0005	0.010954
DDB_G0267688	cpnD	0.740459	1.75762	0.00235	0.0382725
DDB_G0285981	DDB_G0285981	0.737492	1.7281	0.0026	0.0416318
DDB_G0279753	DDB_G0279753	0.735874	1.72181	0.00295	0.045564
DDB_G0281781	DDB_G0281781	0.734317	1.87471	0.0007	0.0145734
DDB_G0302530	DDB_G0302530	0.731022	1.67218	0.0027	0.0426462
DDB_G0275179	DDB_G0275179	0.725236	1.79747	0.0022	0.0362809
DDB_G0276383	DDB_G0276383	0.725229	1.73661	0.00315	0.0480857
DDB_G0276989	DDB_G0276989	0.719958	1.77441	0.00255	0.0410194
DDB_G0280037	ddj1	0.705938	1.7845	0.00175	0.0305433
DDB_G0288001	DDB_G0288001	0.705273	1.78497	0.00185	0.0316556
DDB_G0267448	DDB_G0267448	0.705078	1.82395	0.0011	0.021214
DDB_G0270742	DDB_G0270742	0.692581	1.7191	0.00265	0.0421745
DDB_G0290623	DDB_G0290623	0.690756	1.79431	0.00195	0.03315
DDB_G0292836	DDB_G0292836	0.689639	1.77932	0.0021	0.0351297
DDB_G0277851	DDB_G0277851	0.688737	1.83784	0.00165	0.0290889
DDB_G0285191	DDB_G0285191	0.688482	1.69209	0.00315	0.0480857
DDB_G0267906	DDB_G0267906	0.681317	1.75572	0.0021	0.0351297
DDB_G0286839	gtaW	0.674662	1.79559	0.00215	0.0357378
DDB_G0292120	cnrK	0.669976	1.77721	0.00185	0.0316556
DDB_G0288697	DDB_G0288697	0.662037	1.73462	0.0029	0.0451917
DDB_G0287371	ada	0.658175	1.77285	0.0022	0.0362809

## Sheet: Downregulated genes
Gene_ID	Gene Name	log2_fold_change	test_stat	p_value	q_value
DDB_G0267728	uduA3	-5.90653	-8.9285	5e-05	0.00156766
DDB_G0292258	DDB_G0292258	-4.57155	-5.29171	5e-05	0.00156766
DDB_G0272026	DDB_G0272026	-4.1915	-8.53079	5e-05	0.00156766
DDB_G0282737	DDB_G0282737	-3.82907	-4.09803	5e-05	0.00156766
DDB_G0290993	DDB_G0290993	-3.57609	-7.2629	5e-05	0.00156766
DDB_G0283083	cbpD2	-3.27454	-1.90072	0.00105	0.0204
DDB_G0286957	DDB_G0286957	-3.18821	-2.95904	0.0004	0.00920615
DDB_G0280201	DDB_G0280201	-3.17888	-5.81844	5e-05	0.00156766
DDB_G0268332	uduA1	-3.07537	-4.41768	5e-05	0.00156766
DDB_G0285817	cad3	-3.07268	-2.85824	0.0005	0.010954
DDB_G0283653	DDB_G0283653	-2.89222	-5.22001	5e-05	0.00156766
DDB_G0291223	DDB_G0291223	-2.85463	-4.96216	5e-05	0.00156766
DDB_G0267896	DDB_G0267896	-2.6966	-2.71044	0.00055	0.0119
DDB_G0267328	DDB_G0267328	-2.69331	-3.19932	0.0001	0.00292514
DDB_G0280323	DDB_G0280323	-2.68829	-3.70907	5e-05	0.00156766
DDB_G0286719	ponC4	-2.60932	-4.80106	5e-05	0.00156766
DDB_G0284729	fslK	-2.59345	-3.57546	5e-05	0.00156766
DDB_G0292696	colA	-2.58837	-5.14245	5e-05	0.00156766
DDB_G0288817	osbK	-2.51178	-4.50617	5e-05	0.00156766
DDB_G0283345	comD	-2.40926	-4.77908	5e-05	0.00156766
DDB_G0279741	DDB_G0279741	-2.40767	-2.39185	0.0023	0.0376338
DDB_G0267672	DDB_G0267672	-2.30776	-2.76128	5e-05	0.00156766
DDB_G0277489	DDB_G0277489	-2.28206	-3.24052	5e-05	0.00156766
DDB_G0267292	DDB_G0267292	-2.24927	-4.84459	5e-05	0.00156766
DDB_G0274481	DDB_G0274481	-2.21352	-4.76332	5e-05	0.00156766
DDB_G0270212	DDB_G0270212	-2.09809	-3.40142	5e-05	0.00156766
DDB_G0273493	DDB_G0273493	-2.01854	-2.48504	0.0003	0.00734019
DDB_G0291221	DDB_G0291221	-1.99771	-2.26054	0.0011	0.021214
DDB_G0294246	DDB_G0294246	-1.9945	-2.55707	0.00035	0.00829231
DDB_G0275439	cad2	-1.96563	-3.27235	5e-05	0.00156766
DDB_G0291255	29C	-1.8953	-3.54893	5e-05	0.00156766
DDB_G0284619	DDB_G0284619	-1.87197	-3.30616	5e-05	0.00156766
DDB_G0349499	DDB_G0349499	-1.86027	-2.70089	0.0002	0.005236
DDB_G0283153	cbpD1	-1.85004	-2.14488	5e-05	0.00156766
DDB_G0274405	DDB_G0274405	-1.83975	-3.34955	0.00195	0.03315
DDB_G0282815	DDB_G0282815	-1.80905	-4.13204	5e-05	0.00156766
DDB_G0277709	DDB_G0277709	-1.80739	-3.71937	5e-05	0.00156766
DDB_G0283125	uduD2	-1.77642	-2.25033	0.00055	0.0119
DDB_G0272052	DDB_G0272052	-1.73774	-2.20435	0.00075	0.0154
DDB_G0289113	DDB_G0289113	-1.73269	-2.63731	0.00015	0.00413368
DDB_G0277201	DDB_G0277201	-1.71566	-2.02289	0.0032	0.0485658
DDB_G0286015	gmsA	-1.67807	-3.90965	5e-05	0.00156766
DDB_G0270850	DDB_G0270850	-1.66954	-1.90823	0.00015	0.00413368
DDB_G0290037	DDB_G0290037	-1.65455	-2.31103	0.0003	0.00734019
DDB_G0293522	ponA	-1.63402	-3.89796	5e-05	0.00156766
DDB_G0267756	DDB_G0267756	-1.609	-2.93362	5e-05	0.00156766
DDB_G0284861	eif5a	-1.58137	-2.62873	5e-05	0.00156766
DDB_G0276097	DDB_G0276097	-1.57622	-2.33053	0.0004	0.00920615
DDB_G0284859	samkB	-1.5737	-4.07448	5e-05	0.00156766
DDB_G0267236	DDB_G0267236	-1.56992	-3.15902	5e-05	0.00156766
DDB_G0279983	ctrB	-1.46121	-2.02745	0.0012	0.0226014
DDB_G0284109	DDB_G0284109	-1.40029	-3.05045	5e-05	0.00156766
DDB_G0306976	DDB_G0306976	-1.36604	-3.36903	5e-05	0.00156766
DDB_G0271828	DDB_G0271828	-1.36582	-2.66166	5e-05	0.00156766
DDB_G0275123	alyA	-1.36524	-3.18841	5e-05	0.00156766
DDB_G0274191	dhkC	-1.34966	-2.31955	5e-05	0.00156766
DDB_G0287035	lmpB	-1.34116	-2.62608	5e-05	0.00156766
DDB_G0281399	DDB_G0281399	-1.31945	-3.29192	5e-05	0.00156766
DDB_G0279985	DDB_G0279985	-1.3151	-3.20399	5e-05	0.00156766
DDB_G0283271	DDB_G0283271	-1.29811	-3.15036	5e-05	0.00156766
DDB_G0287399	DDB_G0287399	-1.29564	-2.72053	5e-05	0.00156766
DDB_G0281149	DDB_G0281149	-1.2829	-2.27498	0.0003	0.00734019
DDB_G0272340	DDB_G0272340	-1.27986	-3.26557	5e-05	0.00156766
DDB_G0286897	DDB_G0286897	-1.27188	-3.16929	5e-05	0.00156766
DDB_G0274441	psiL	-1.27165	-3.35687	5e-05	0.00156766
DDB_G0282137	DDB_G0282137	-1.26973	-1.90205	0.00185	0.0316556
DDB_G0293210	sgmB	-1.24782	-3.09875	5e-05	0.00156766
DDB_G0293202	DDB_G0293202	-1.24614	-2.2223	5e-05	0.00156766
DDB_G0270318	DDB_G0270318	-1.24151	-2.83295	5e-05	0.00156766
DDB_G0277183	H4a	-1.23532	-2.1804	0.00115	0.0218167
DDB_G0283095	DD3-3	-1.23132	-2.47011	5e-05	0.00156766
DDB_G0272238	DDB_G0272238	-1.22161	-2.30618	5e-05	0.00156766
DDB_G0269436	DDB_G0269436	-1.22082	-1.91484	0.00175	0.0305433
DDB_G0270430	wipA	-1.20312	-3.05779	5e-05	0.00156766
DDB_G0278613	DDB_G0278613	-1.19434	-3.00826	5e-05	0.00156766
DDB_G0281345	DDB_G0281345	-1.19241	-1.85282	0.00205	0.0345138
DDB_G0270986	tspC	-1.19195	-2.05557	0.00085	0.0170195
DDB_G0288003	DDB_G0288003	-1.18457	-2.00476	0.00085	0.0170195
DDB_G0275789	DDB_G0275789	-1.17206	-2.89501	5e-05	0.00156766
DDB_G0284645	DDB_G0284645	-1.16595	-2.89763	5e-05	0.00156766
DDB_G0292188	DDB_G0292188	-1.16241	-2.98606	5e-05	0.00156766
DDB_G0270730	fslB	-1.15512	-2.28449	0.0002	0.005236
DDB_G0278563	DDB_G0278563	-1.14823	-2.88471	5e-05	0.00156766
DDB_G0290815	DDB_G0290815	-1.14791	-1.96579	0.0007	0.0145734
DDB_G0286695	DDB_G0286695	-1.14266	-2.53046	0.0001	0.00292514
DDB_G0269248	cf45-1	-1.1423	-2.7497	5e-05	0.00156766
DDB_G0278581	psiF	-1.13757	-2.3354	5e-05	0.00156766
DDB_G0271582	mdn1_ps3	-1.13249	-2.55199	0.003	0.046268
DDB_G0281609	DDB_G0281609	-1.12887	-2.87139	5e-05	0.00156766
DDB_G0289551	DDB_G0289551	-1.12137	-2.86043	5e-05	0.00156766
DDB_G0290475	DDB_G0290475	-1.11145	-2.56309	5e-05	0.00156766
DDB_G0292830	nhe3	-1.09467	-2.6879	5e-05	0.00156766
DDB_G0284671	DDB_G0284671	-1.09384	-2.83974	5e-05	0.00156766
DDB_G0288239	sibE	-1.08837	-2.66781	5e-05	0.00156766
DDB_G0278721	cprD	-1.07114	-1.897	0.00145	0.0263161
DDB_G0267746	DDB_G0267746	-1.06501	-2.53064	5e-05	0.00156766
DDB_G0290605	DDB_G0290605	-1.06273	-2.83104	5e-05	0.00156766
DDB_G0274655	DDB_G0274655	-1.06009	-2.80821	5e-05	0.00156766
DDB_G0280857	DDB_G0280857	-1.04619	-1.68011	0.0032	0.0485658
DDB_G0283975	DDB_G0283975	-1.04406	-2.15696	0.0005	0.010954
DDB_G0291356	grlE	-1.02969	-2.66148	5e-05	0.00156766
DDB_G0295791	DDB_G0295791	-1.01781	-2.07484	0.00045	0.0102
DDB_G0274295	DDB_G0274295	-1.0105	-2.4638	5e-05	0.00156766
DDB_G0269404	DDB_G0269404	-1.00265	-1.91521	0.00135	0.0249333
DDB_G0292860	DDB_G0292860	-1.00102	-2.57833	5e-05	0.00156766
DDB_G0293446	DDB_G0293446	-1.00049	-1.94291	0.00095	0.0188417
DDB_G0288095	DDB_G0288095	-0.993638	-2.61858	5e-05	0.00156766
DDB_G0293208	DDB_G0293208	-0.980315	-2.07643	0.00025	0.00638537
DDB_G0270296	dcd1A	-0.973207	-2.6045	5e-05	0.00156766
DDB_G0288475	DDB_G0288475	-0.968079	-2.30354	0.0001	0.00292514
DDB_G0287367	DDB_G0287367	-0.96503	-1.94069	0.00075	0.0154
DDB_G0288405	DDB_G0288405	-0.963813	-2.42211	5e-05	0.00156766
DDB_G0291081	pefA	-0.959582	-2.16973	0.00025	0.00638537
DDB_G0279551	DDB_G0279551	-0.952065	-1.91899	0.00185	0.0316556
DDB_G0282993	sodC	-0.943725	-2.24011	0.00015	0.00413368
DDB_G0269482	DDB_G0269482	-0.938193	-2.26912	0.00015	0.00413368
DDB_G0269760	DDB_G0269760	-0.93794	-2.38752	5e-05	0.00156766
DDB_G0281207	DDB_G0281207	-0.935045	-2.32084	0.0001	0.00292514
DDB_G0288887	DDB_G0288887	-0.934987	-2.0226	5e-05	0.00156766
DDB_G0275507	DDB_G0275507	-0.931052	-2.18317	5e-05	0.00156766
DDB_G0267848	DDB_G0267848	-0.925804	-2.4253	5e-05	0.00156766
DDB_G0291107	DDB_G0291107	-0.923042	-2.38182	5e-05	0.00156766
DDB_G0289599	comA	-0.920434	-2.262	0.00015	0.00413368
DDB_G0277455	plbE	-0.90955	-2.37583	5e-05	0.00156766
DDB_G0278531	DDB_G0278531	-0.908752	-1.5999	0.00305	0.0468323
DDB_G0283623	DDB_G0283623	-0.895727	-2.1482	0.0005	0.010954
DDB_G0277915	gefI	-0.895409	-2.39963	0.0001	0.00292514
DDB_G0278573	DDB_G0278573	-0.88796	-1.85134	0.0022	0.0362809
DDB_G0286021	DDB_G0286021	-0.880212	-2.15662	0.00015	0.00413368
DDB_G0268890	aplJ	-0.876527	-1.85439	0.00155	0.027699
DDB_G0268212	DDB_G0268212	-0.870528	-2.10284	0.00035	0.00829231
DDB_G0275909	DDB_G0275909	-0.861302	-1.91294	0.0008	0.0161418
DDB_G0268302	rpl38	-0.860663	-1.80641	0.0015	0.0270361
DDB_G0293066	DDB_G0293066	-0.854078	-2.04084	0.00035	0.00829231
DDB_G0295739	DDB_G0295739	-0.850181	-1.87363	0.00155	0.027699
DDB_G0289877	rpl9	-0.84981	-2.29554	0.000456	0.035688
DDB_G0273983	rpl15-2	-0.849613	-2.26448	5e-05	0.00156766
DDB_G0282379	rpl28	-0.842876	-1.76947	0.00225	0.036931
DDB_G0270826	abcG22	-0.841839	-2.15037	0.0003	0.00734019
DDB_G0272532	DDB_G0272532	-0.837241	-2.00888	0.0005	0.010954
DDB_G0281313	DDB_G0281313	-0.83475	-2.15266	0.00035	0.00829231
DDB_G0278785	DDB_G0278785	-0.833721	-2.04055	0.0004	0.00920615
DDB_G0283609	cbpG	-0.818702	-1.81091	0.0019	0.0324581
DDB_G0292894	DDB_G0292894	-0.818265	-2.09785	0.0003	0.00734019
DDB_G0283389	rhgA	-0.811792	-1.9619	0.00055	0.0119
DDB_G0278429	rps20	-0.809808	-1.76271	0.0027	0.0426462
DDB_G0287359	DDB_G0287359	-0.806311	-2.07046	0.00025	0.00638537
DDB_G0269842	DDB_G0269842	-0.799379	-1.94269	0.0007	0.0145734
DDB_G0286057	adk	-0.796993	-1.73182	0.00325	0.0491111
DDB_G0278295	DDB_G0278295	-0.792498	-1.68591	0.00295	0.045564
DDB_G0290985	DDB_G0290985	-0.791083	-2.12195	0.0002	0.005236
DDB_G0283339	DDB_G0283339	-0.790315	-2.04888	0.0002	0.005236
DDB_G0271086	DDB_G0271086	-0.785236	-2.07432	0.00025	0.00638537
DDB_G0288537	DDB_G0288537	-0.780945	-1.86908	0.0018	0.0312597
DDB_G0267640	gtaE	-0.770198	-1.99022	0.00075	0.0154
DDB_G0277729	DDB_G0277729	-0.769174	-1.83755	0.00185	0.0316556
DDB_G0277387	DDB_G0277387	-0.766523	-2.03306	0.0005	0.010954
DDB_G0268180	DDB_G0268180	-0.756511	-1.75313	0.0026	0.0416318
DDB_G0293812	DDB_G0293812	-0.751675	-1.85957	0.00135	0.0249333
DDB_G0269106	cahA	-0.748417	-1.78785	0.0024	0.0389656
DDB_G0275353	DDB_G0275353	-0.747395	-1.92057	0.00115	0.0218167
DDB_G0276791	DDB_G0276791	-0.745056	-1.89909	0.00135	0.0249333
DDB_G0292432	DDB_G0292432	-0.742638	-1.99822	0.001	0.0196473
DDB_G0286509	H2Bv3	-0.740853	-1.78292	0.0032	0.0485658
DDB_G0274917	vps13B	-0.737235	-1.80026	0.00225	0.036931
DDB_G0270074	DDB_G0270074	-0.73092	-1.94425	0.0009	0.017952
DDB_G0283393	rplP2	-0.726928	-1.68015	0.00325	0.0491111
DDB_G0284591	DDB_G0284591	-0.720636	-1.76706	0.00195	0.03315
DDB_G0283485	DDB_G0283485	-0.705807	-1.73608	0.0025	0.0404637
DDB_G0286727	DDB_G0286727	-0.704353	-1.75679	0.0033	0.0496517
DDB_G0288379	DDB_G0288379	-0.70405	-1.80994	0.00135	0.0249333
DDB_G0281065	DDB_G0281065	-0.69794	-1.73342	0.00235	0.0382725
DDB_G0287995	rplp1B	-0.696633	-1.72097	0.00295	0.045564
DDB_G0270774	DDB_G0270774	-0.69554	-1.79918	0.0013	0.0243535
DDB_G0287031	gpaC	-0.689851	-1.71721	0.00295	0.045564
DDB_G0269364	stlA	-0.669433	-1.80007	0.00225	0.036931
DDB_G0281037	DDB_G0281037	-0.664954	-1.78838	0.002	0.03389
DDB_G0290885	DDB_G0290885	-0.645062	-1.70831	0.0029	0.0451917
DDB_G0289149	litaf	-0.630596	-1.68804	0.0033	0.0496517
